# Supplementary material for: Nanoscale covalent organic framework-mediated pyroelectrocatalytic activation of immunogenic cell death for potent immunotherapy
Source: PubMed Central journal article supplement — Sci Adv. 2024 Nov 29;10(48):eadr5145. doi: 10.1126/sciadv.adr5145 (PMC11606443; doi:10.1126/sciadv.adr5145), 2024-11-29
Supplement: sciadv.adr5145_sm.pdf [file sciadv.adr5145_sm.pdf]

Supplementary Materials for  
**Nanoscale covalent organic framework-mediated pyroelectrocatalytic  
activation of immunogenic cell death for potent immunotherapy**

Xingguang Li *et al.*

Corresponding author: Xingguang Li, [lixingguang@ecust.edu.cn](mailto:lixingguang@ecust.edu.cn); Pei-Nian Liu, [liupn@ecust.edu.cn](mailto:liupn@ecust.edu.cn);  
Huijing Xiang, [xianghuijing@shu.edu.cn](mailto:xianghuijing@shu.edu.cn)

*Sci. Adv.* **10**, eadr5145 (2024)  
DOI: 10.1126/sciadv.adr5145

**This PDF file includes:**

Supplementary Text  
Figs. S1 to S49

## Supplementary Text

### Materials

Chemicals used in this work: ethanol, dichloromethane, *n*-hexane, toluene, and *o*-xylene were purchased from GENERAL-REAGENT (Titan, China). Silica gel (200-300 mesh) and neutral alumina used for column chromatography was purchased from Shanghai Zhonghe Chemical Technology Co., Ltd. Fetal bovine serum (FBS), Dulbecco's Modified Eagle Medium (DMEM), and 0.25% trypsin-ethylene diamine tetraacetic acid (EDTA) solution was purchased from Thermo Fisher Scientific (USA). 2',7'-dichlorodihydrofluorescein diacetate (DCFH-DA) were purchased from Biyotime Biotechnology Co., Ltd. 1,3-Diphenylisobenzofuran (DPBF) and 2,2,6,6-tetramethylpiperidine (TMEP) were obtained from Bidepharm (China). Female BALB/cJGpt mice (Strain NO. N000020) and Female BALB/c-Nude (Strain NO. D000521) were obtained from the GemPharmatech Co., Ltd..

### Pyro-current measurements

Pyro-currents were recorded on an electrochemical workstation (Autolab Nova). TPAD-COF NPs (10 mg mL<sup>-1</sup>) were mixed with ethanol (10 μL) and Nafioner fluorinated resin solution (10 μL), the mixture was spread on a glass electrode, and then immersed in 30 mL of 0.5 M Na<sub>2</sub>SO<sub>4</sub> solution. The pyro-current and potential of the solution under alternating NIR laser irradiation (1.0 W cm<sup>-2</sup>) were monitored.

### Cell culture

The mouse breast cancer line (4T1 cells, CSTR:19375.09.3101MOUTCM32) and Human Umbilical Vein Endothelial Cells (HUVEC, 4201PAT-CCTCC02060) was purchased from the Shanghai Institute of Cells, Chinese Academy of Sciences. 4T1 cells and HUVEC were cultured in Roswell Park Memorial Institute (RPMI)-1640 medium (Gibco) containing 10% fetal bovine serum (FBS, Gibco) and 1% penicillin-streptomycin (Invitrogen) at 37°C under 5% CO<sub>2</sub>.

### In vitro live/dead staining analysis

4T1 cells were cultured overnight in confocal dishes (10<sup>5</sup> cells/dish), and then treated as follows, including PBS, Laser, TPAD-COF NPs, and TPAD-COF NPs + Laser. After washed with PBS, calcein-AM/PI were added to the CLSM dishes of different groups to label live/dead cells, respectively. After staining for 30 min, the cells were rinsed and observed by CLSM.

### In vitro cell apoptosis detection

4T1 cells were inoculated into 6-well plates overnight, and then received different treatments, including PBS, Laser, TPAD-COF NPs, TPAD-COF NPs + Laser. After rinsed with PBS, the cells were collected by trypsinization and centrifugation, labeled with Annexin V-FITC and PI, and analyzed by flow cytometry.

### In vivo toxicity assay

Female Balb/c mice were randomized into 3 groups (*n* = 5), including PBS, TPAD-COF NPs (10 mg kg<sup>-1</sup>), and TPAD-COF NPs (20 mg kg<sup>-1</sup>), followed by 14 days of feeding. The mouse body weights of each group were monitored every 2 days. Finally, the mice were sacrificed, the blood and major organs of each group were collected for blood examination and histological analysis, respectively.

**Immune response analysis**

The cell suspensions of tumor tissues in diverse treatment groups were labeled with anti-CD80-PE, anti-CD86-APC, and anti-CD11c-FITC for 30 min at 4°C, and analyzed by flow cytometry for in vivo DC maturation evaluation. After removal of excess antibody by centrifugation, the lymphocyte suspensions were analyzed by flow cytometry. For CD8<sup>+</sup> and CD4<sup>+</sup> T cell analysis in spleen and tumor tissues, cell suspensions of diverse groups were labeled with anti-CD3-FITC, anti-CD4-APC, and anti-CD8-PE, and then analyzed by flow cytometry and immunofluorescence staining, respectively. In addition, Tregs suspensions were labeled with anti-CD4-APC, anti-Foxp3-PE for flow cytometry analysis. Furthermore, M1 and M2 macrophages were stained with anti-F4/80-PE, anti-CD80-PE and anti-CD206 for flow cytometry analysis. Additionally, the expression levels of cytokines were detected by ELISA kits.

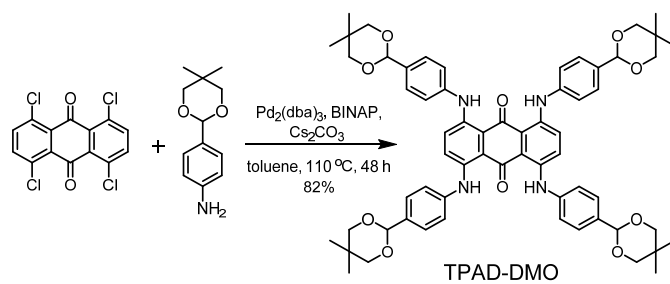

**Fig. S1.** Synthetic route of 1,4,5,8-tetrakis((4-(5,5-dimethyl-1,3-dioxan-2-yl) ph-enyl) amino) anthracene-9,10-dione (TPAD-DMO).

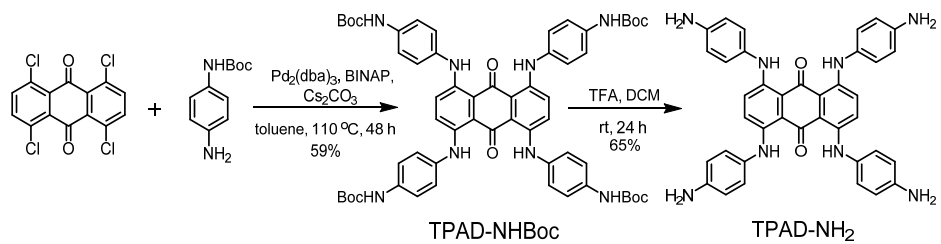

**Fig. S2.** Synthetic route of 1,4,5,8-tetrakis((4-aminophenyl) amino) anthracene-9,10-dione (TPAD-NH<sub>2</sub>).

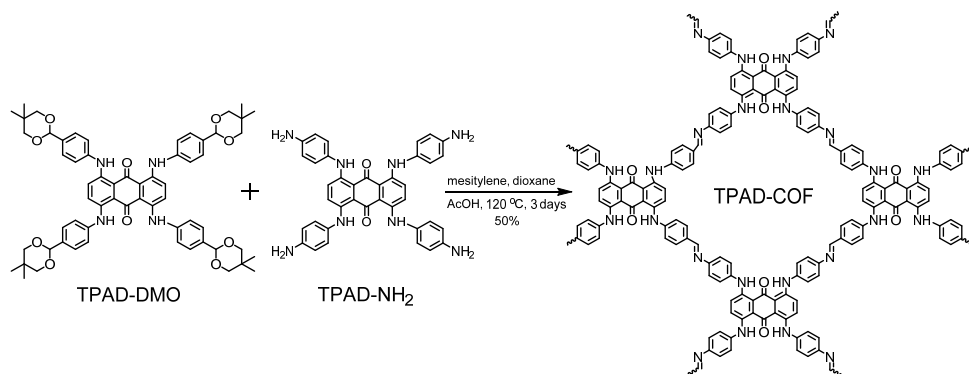

**Fig. S3.** Synthetic route of TPAD-COF.

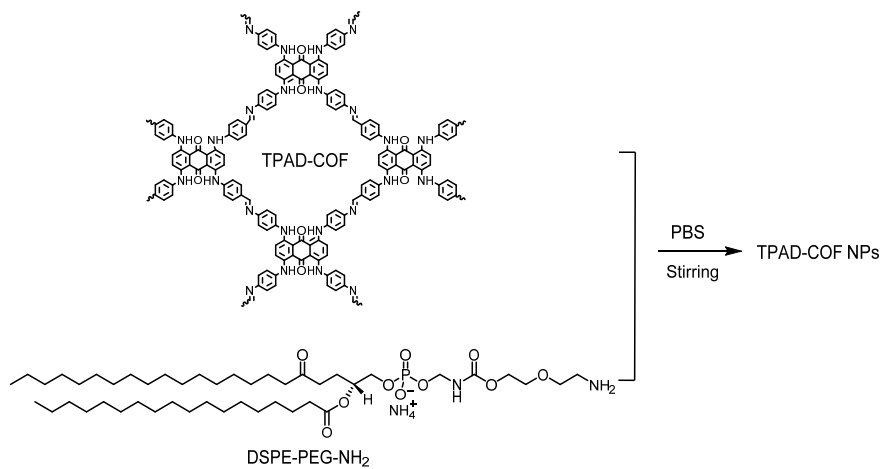

**Fig. S4.** Synthetic route of TPAD-COF NPs.

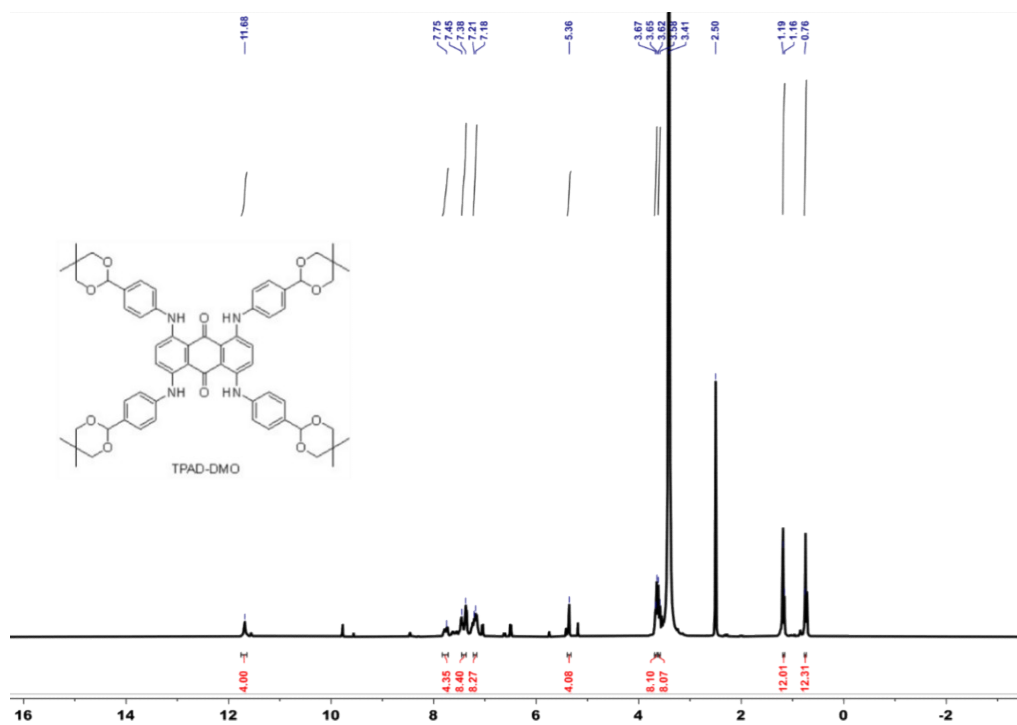

**Fig. S5.** <sup>1</sup>H NMR of TPAD-DMO.

<sup>1</sup>H NMR (400 MHz, DMSO-*d*<sub>6</sub>) δ 11.68 (s, 4H), 7.75 (s, 4H), 7.41 (d, *J* = 28.0 Hz, 8H), 7.20 (d, *J* = 11.8 Hz, 8H), 5.36 (s, 4H), 3.66 (d, *J* = 10.4 Hz, 8H), 3.60 (d, *J* = 13.8 Hz, 8H), 1.17 (d, *J* = 13.2 Hz, 12H), 0.76 (s, 12H).



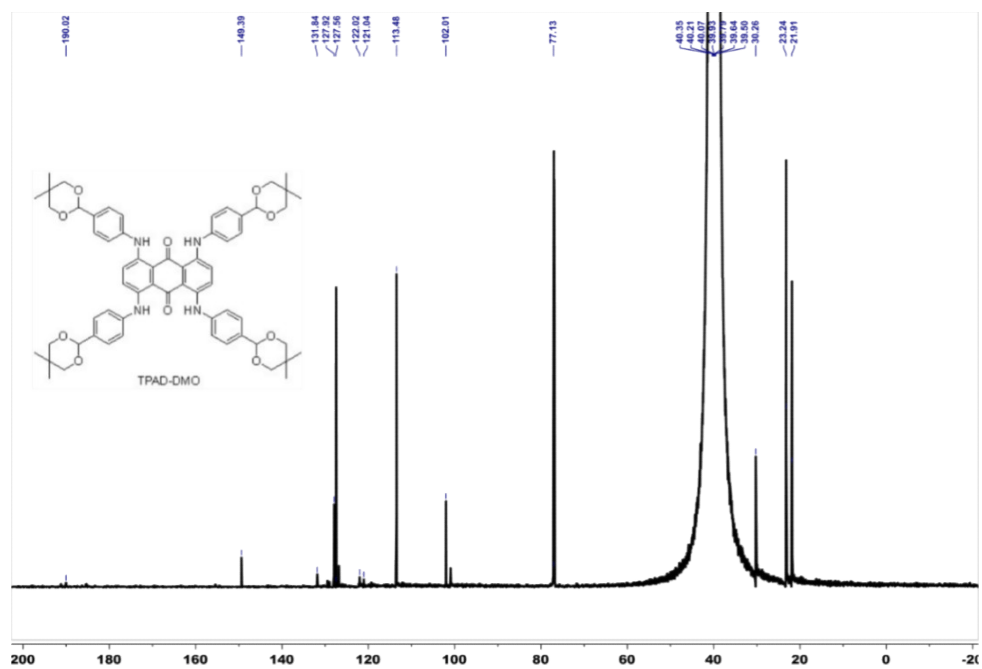

**Fig. S6.** <sup>13</sup>C NMR of TPAD-DMO.  
<sup>13</sup>C NMR (150 MHz, DMSO-*d*<sub>6</sub>) δ 190.0, 149.4, 131.8, 127.9, 127.5, 122.0, 121.0, 113.5, 102.0, 77.1, 30.3, 23.2, 21.9.

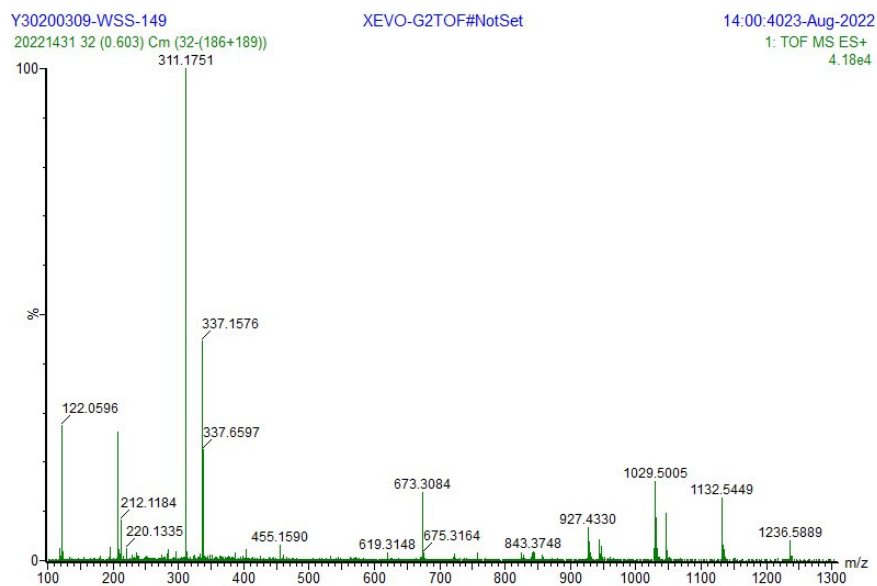

**Fig. S7.** High-resolution mass spectrum (HRMS, ESI) of TPAD-DMO.  
HRMS (ESI):  $m/z$   $[M + H]^+$  calcd. for  $C_{62}H_{69}N_4O_{10}^+$ : 1029.4856; found: 1029.5005.

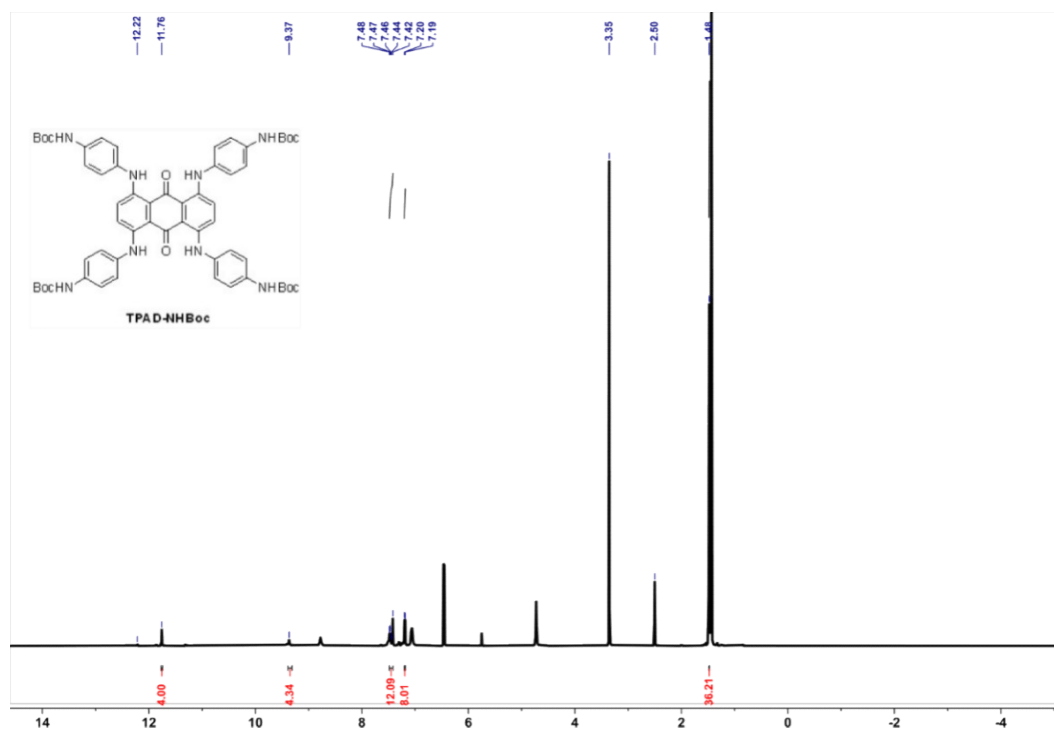

**Fig. S8.** <sup>1</sup>H NMR of TPAD-NHBoc.

<sup>1</sup>H NMR (400 MHz, DMSO-*d*<sub>6</sub>) δ 11.76 (s, 4H), 9.37 (s, 4H), 7.48-7.42 (m, 12H), 7.19 (d, *J* = 6.0 Hz, 8H), 1.48 (s, 36H).

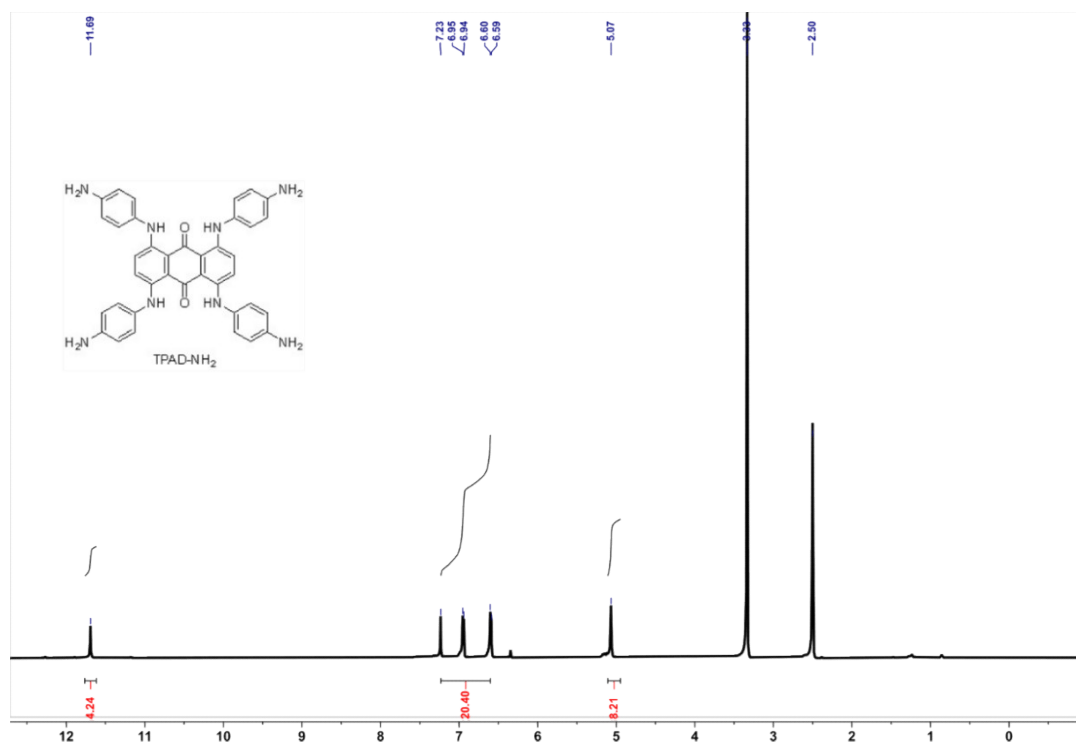

**Fig. S9.** <sup>1</sup>H NMR of TPAD-NH<sub>2</sub>.

<sup>1</sup>H NMR (400 MHz, DMSO-*d*<sub>6</sub>) δ 11.69 (s, 4H), 7.23-6.59 (m, 20H), 5.07 (s, 8H).

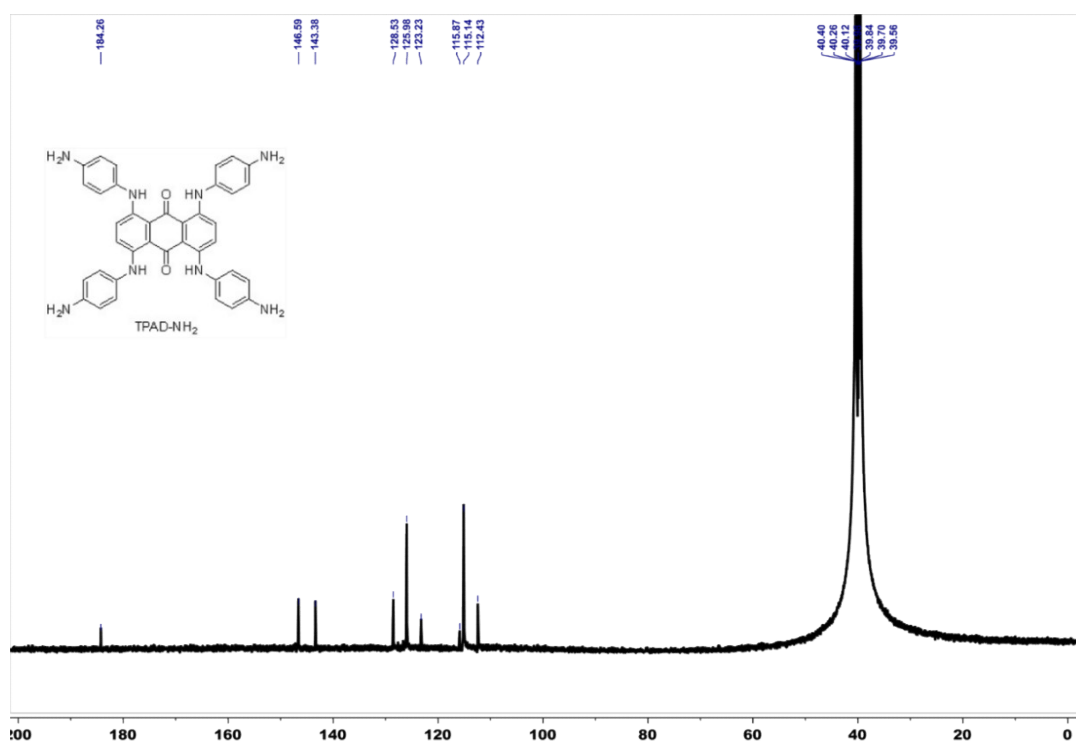

**Fig. S10.**  $^{13}\text{C}$  NMR of TPAD-NH<sub>2</sub>.

$^{13}\text{C}$  NMR (150 MHz, DMSO-*d*<sub>6</sub>)  $\delta$  184.2, 146.5, 143.3, 128.5, 126.0, 123.2, 115.9, 115.1, 112.4.

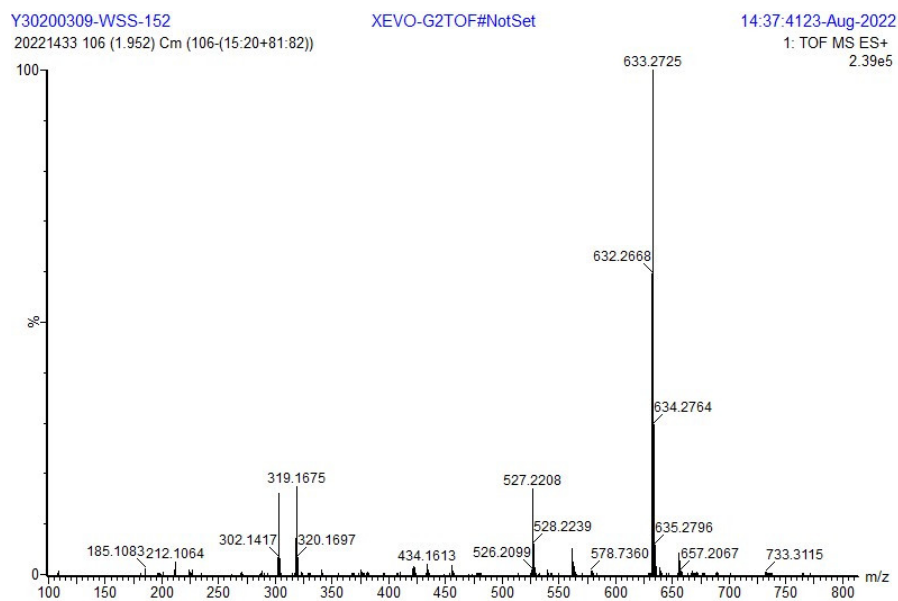

**Fig. S11.** HRMS (ESI) of TPAD-NH<sub>2</sub>.

HRMS (ESI): m/z [M + H]<sup>+</sup> calcd. for C<sub>38</sub>H<sub>33</sub>N<sub>8</sub>O<sub>2</sub><sup>+</sup>: 633.2569; found: 633.2725.

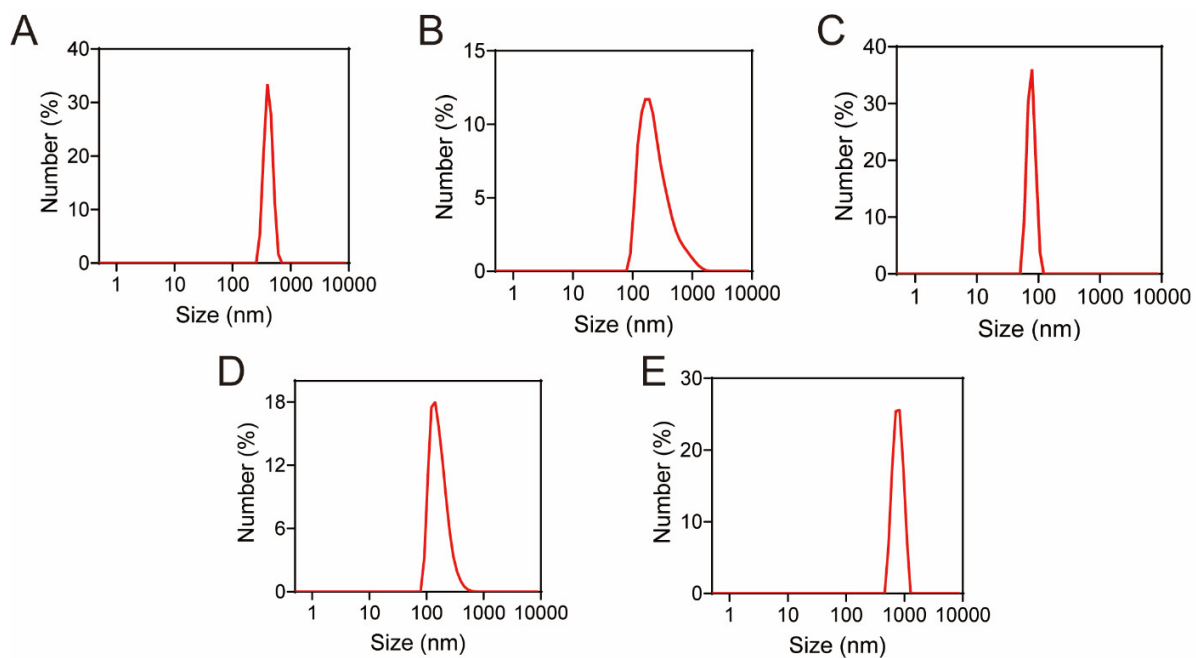

**Fig. S12.** Size distribution for various concentrations of TPAD-COF NPs, including (A)  $10 \mu\text{g mL}^{-1}$ , (B)  $50 \mu\text{g mL}^{-1}$ , (C)  $100 \mu\text{g mL}^{-1}$ , (D)  $200 \mu\text{g mL}^{-1}$ , and (E)  $500 \mu\text{g mL}^{-1}$ .

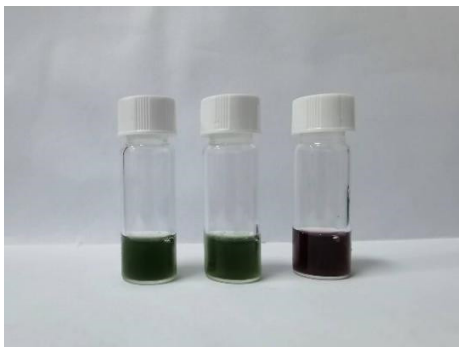

**Fig. S13.** Photograph of TPAD-COF NPs in PBS, water, and DMEM (from left to right).



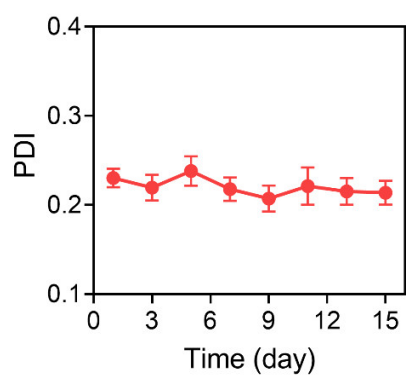

**Fig. S14.** Polydispersity index (PDI) of TPAD-COF NPs in PBS within 15 days ( $n = 3$ ).

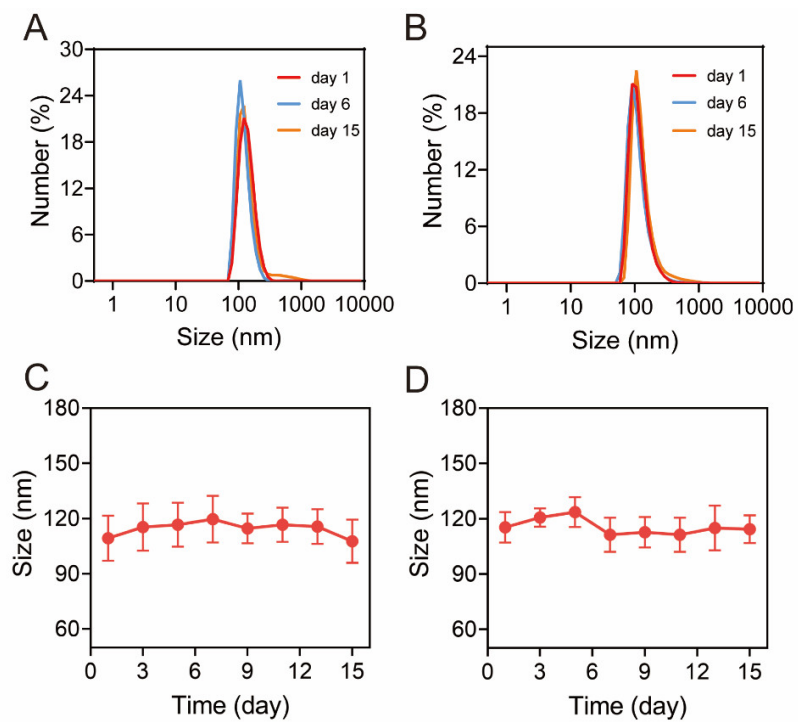

**Fig. S15.** Dynamic light scattering analysis of TPAD-COF NPs in (A and C) DMEM, and (B and D) 10% FBS in water over 15 days ( $n = 3$ ).

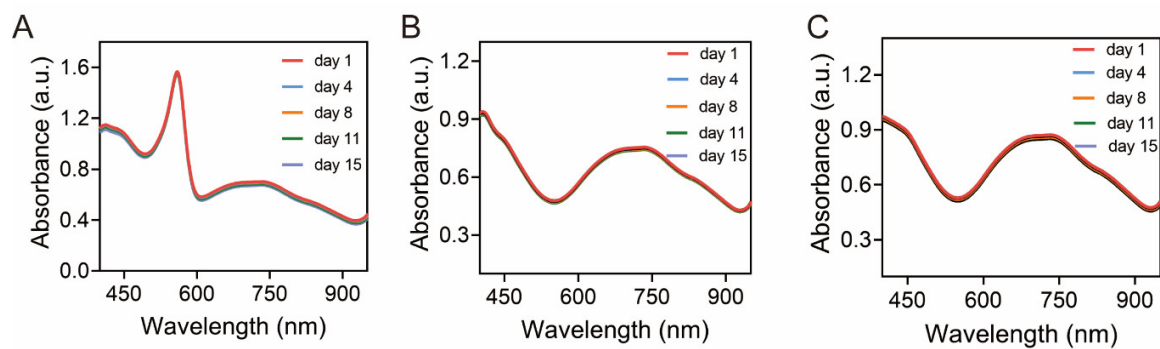

**Fig. S16.** UV-vis absorption spectra of TPAD-COF NPs in (A) DMEM, (B) 10% FBS in water, and (C) PBS over 15 days.

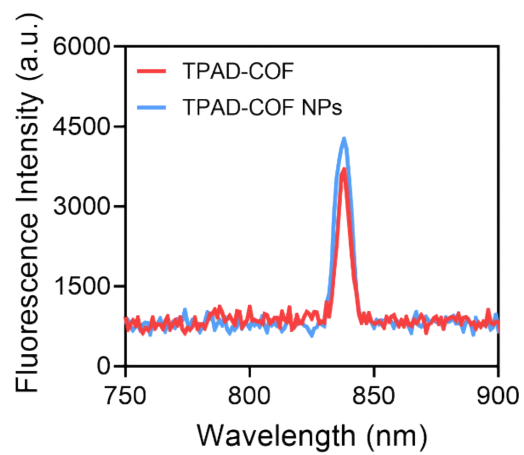

**Fig. S17.** Fluorescence spectra of TPAD-COF and TPAD-COF NPs.

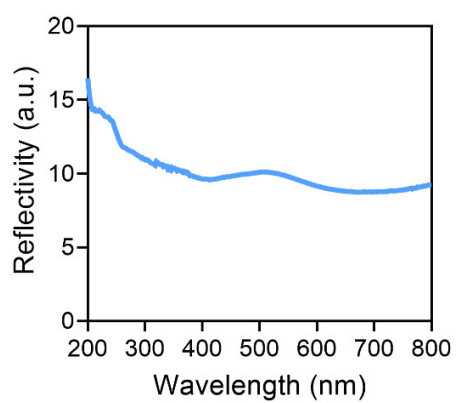

**Fig. S18.** UV-vis diffuse reflectance spectrum of TPAD-COF NPs.

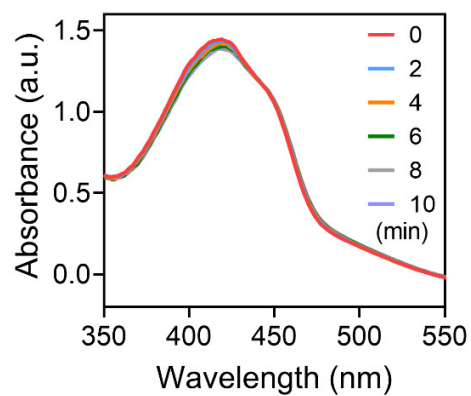

**Fig. S19.** UV-vis absorption spectra of DPBF containing PBS solution under NIR laser irradiation for 10 min ( $200 \mu\text{g mL}^{-1}$ ,  $1.0 \text{ W cm}^{-2}$ ).

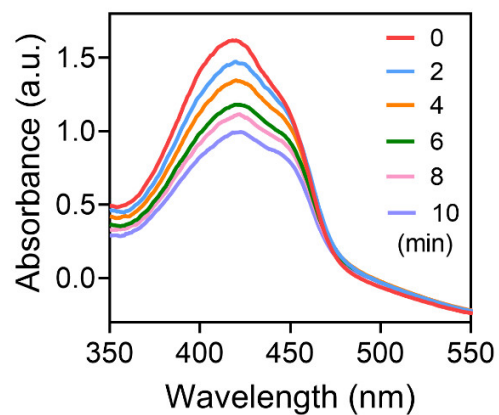

**Fig. S20.** UV-vis absorption spectra of DPBF containing TPAD-COF NPs solution under NIR laser irradiation for 10 min ( $200 \mu\text{g mL}^{-1}$ ,  $1.0 \text{ W cm}^{-2}$ ).

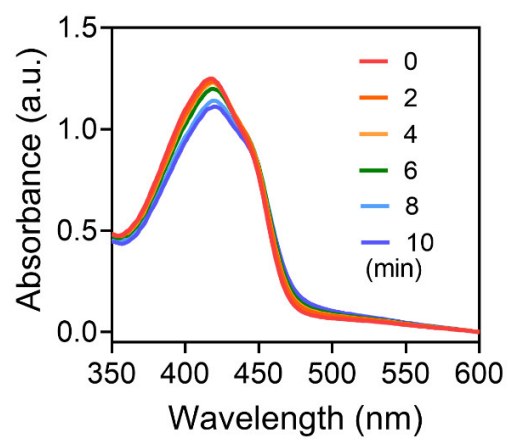

**Fig. S21.** UV-vis absorption spectra of DPBF containing TPAD-COF NPs for 10 min without NIR laser irradiation.



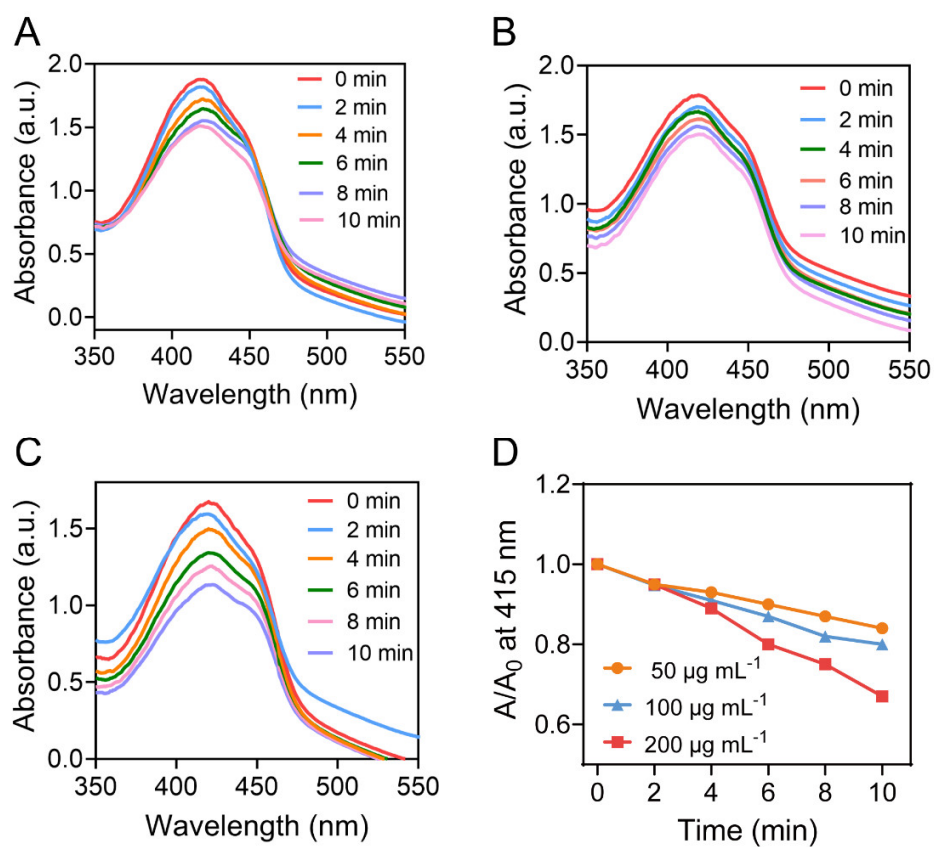

**Fig. S22.** UV-vis absorption spectra of DPBF solution containing TPAD-COF NPs at different doses, including (A)  $50 \mu\text{g mL}^{-1}$ , (B)  $100 \mu\text{g mL}^{-1}$ , (C)  $200 \mu\text{g mL}^{-1}$ . (D) Normalized changes in the absorbance of DPBF solution at 415 nm at diverse concentrations.

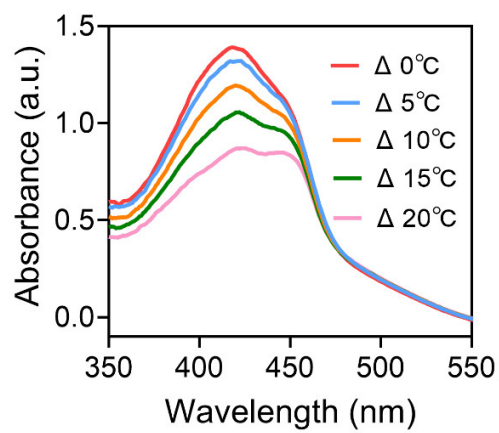

**Fig. S23.** UV-vis absorption spectra of DPBF solution containing TPAD-COF NPs under increasing temperature gradients ( $1.0 \text{ W cm}^{-2}$ ).

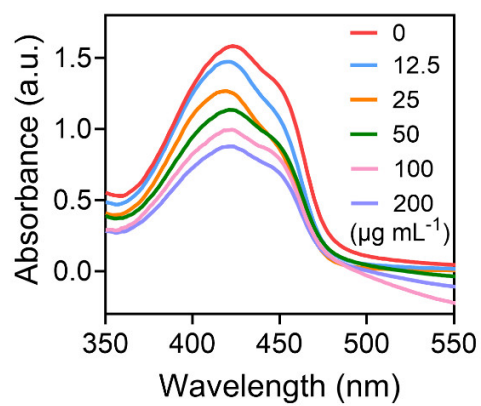

**Fig. S24.** UV-vis absorption spectra of DPBF solution containing elevating doses of TPAD-COF NPs under NIR laser irradiation ( $1.0 \text{ W cm}^{-2}$ ).

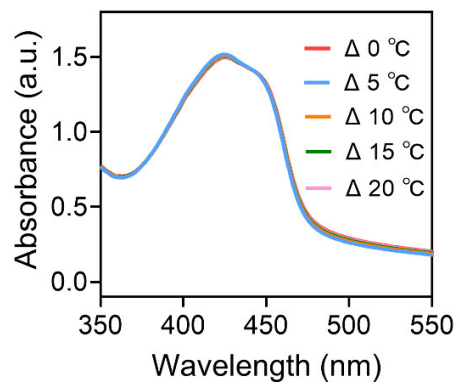

**Fig. S25.** UV-vis absorption spectra of DPBF solution alone at increasing temperature gradients.

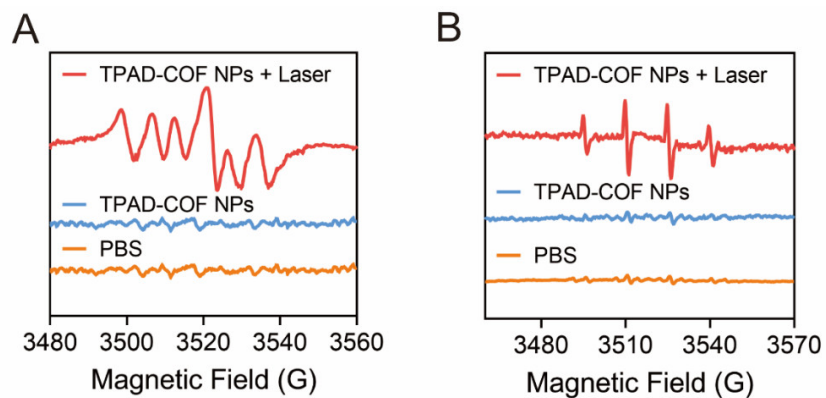

**Fig. S26.** ESR spectra illustrating (A)  $\bullet\text{O}_2^-$  and (B)  $\bullet\text{OH}$  generation in various treatment groups.

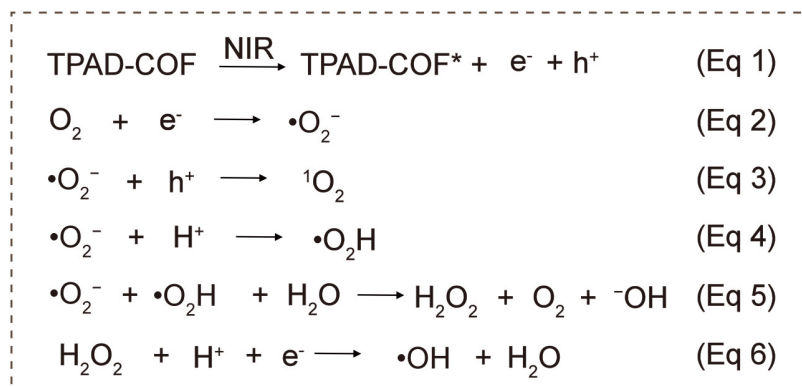

**Fig. S27.** The reaction steps for reactive oxygen species (ROS) generation.

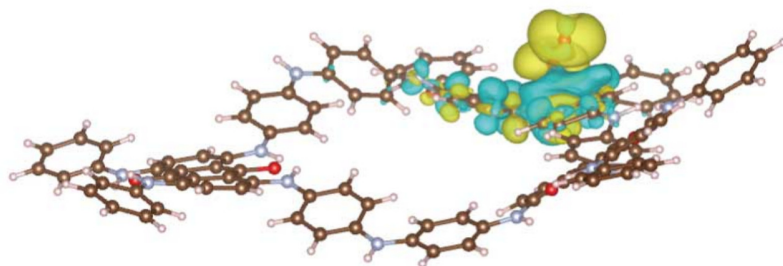

**Fig. S28.** Differential charge density plot of TPAD-COF NPs absorbed by O<sub>2</sub>, with cyan and yellow indicating the regions of electron depletion and electron accumulation, respectively.

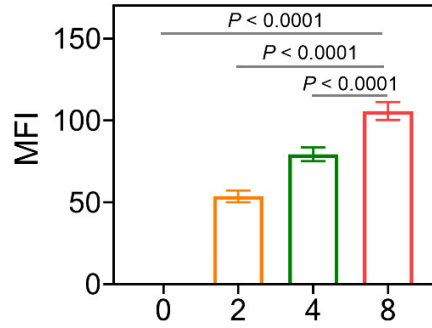

**Fig. S29.** Quantitative analysis of 4T1 cell uptake after incubation of Cy5.5-labeled TPAD-COF NPs for various durations by confocal laser scanning microscopy (CLSM) observation ( $n = 3$ ). Data are represented as mean  $\pm$  SD and analyzed by one-way ANOVA test.



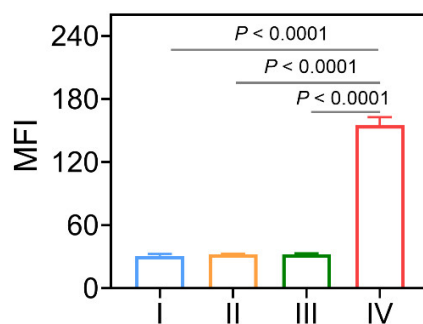

**Fig. S30.** Quantitative analysis of the fluorescence intensity of 2',7'-dichlorofluorescein (DCF) in different treatment groups by CLSM observation ( $n = 3$ ). I: Control, II: Laser (1.5 W cm<sup>-2</sup>, 10 min), III: TPAD-COF NPs (100 μg mL<sup>-1</sup>), and IV: TPAD-COF NPs (100 μg mL<sup>-1</sup>) + Laser (1.5 W cm<sup>-2</sup>, 10 min). Data are represented as mean ± SD and analyzed by one-way ANOVA test.

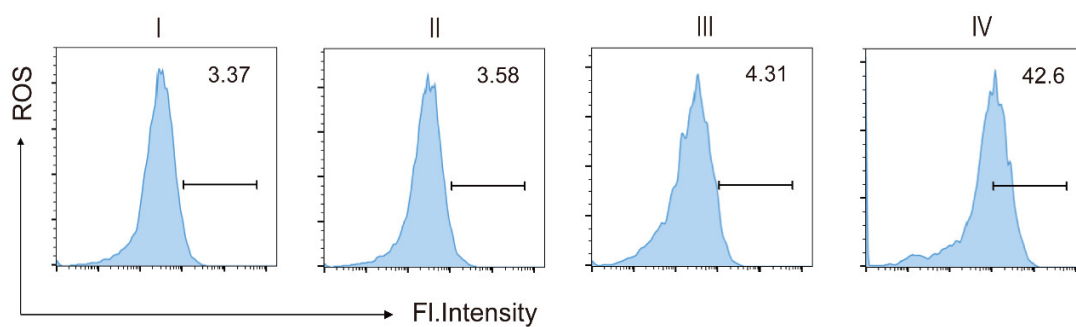

**Fig. S31.** Flow cytometry analysis of ROS generation in various treatment groups. I: Control, II: Laser (1 W cm<sup>-2</sup>, 10 min), III: TPAD-COF NPs (100 μg mL<sup>-1</sup>), and IV: TPAD-COF NPs (100 μg mL<sup>-1</sup>) + Laser (1 W cm<sup>-2</sup>, 10 min).

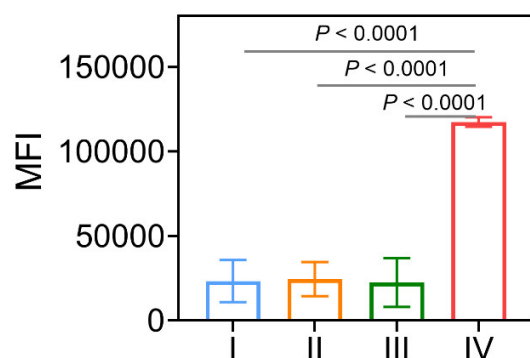

**Fig. S32.** Quantitative analysis of the mean fluorescence intensity of DCF after diverse treatments by flow cytometry analysis ( $n = 3$ ). I: Control, II: Laser ( $1 \text{ W cm}^{-2}$ , 10 min), III: TPAD-COF NPs ( $100 \mu\text{g mL}^{-1}$ ), and IV: TPAD-COF NPs ( $100 \mu\text{g mL}^{-1}$ ) + Laser ( $1 \text{ W cm}^{-2}$ , 10 min). Data are represented as mean  $\pm$  SD and analyzed by one-way ANOVA test.

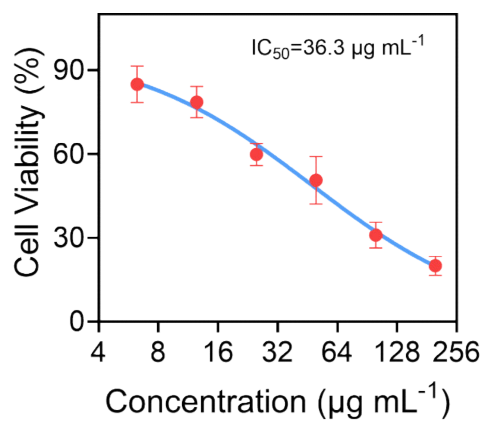

**Fig. S33.** The half maximal inhibitory concentration ( $\text{IC}_{50}$ ) of TPAD-COF NPs under 808 nm laser irradiation for 10 min ( $n = 5$ ). Data are represented as mean  $\pm$  SD.

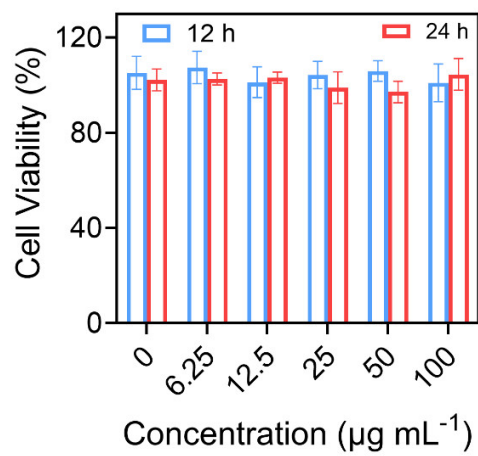

**Fig. S34.** Viability of HUVEC cells treated with various doses of TPAD-COF NPs for 12 and 24 h ( $n = 5$ ). Data are represented as mean  $\pm$  SD.

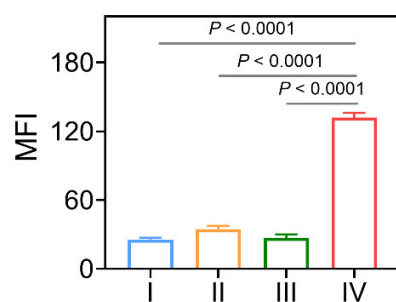

**Fig. S35.** Quantitative analysis of the mean fluorescence intensity of CRT after different treatments by CLSM ( $n = 3$ ). I: Control, II: Laser ( $1 \text{ W cm}^{-2}$ , 10 min), III: TPAD-COF NPs ( $100 \mu\text{g mL}^{-1}$ ), and IV: TPAD-COF NPs ( $100 \mu\text{g mL}^{-1}$ ) + Laser ( $1 \text{ W cm}^{-2}$ , 10 min). Data are represented as mean  $\pm$  SD and analyzed by one-way ANOVA test.

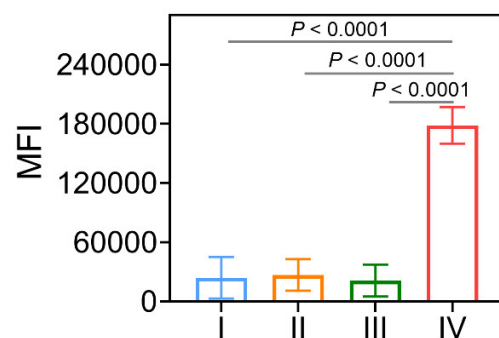

**Fig. S36.** Quantitative analysis of the mean fluorescence intensity of CRT after different treatments by flow cytometry analysis ( $n = 3$ ). I: Control, II: Laser ( $1 \text{ W cm}^{-2}$ , 10 min), III: TPAD-COF NPs ( $100 \mu\text{g mL}^{-1}$ ), and IV: TPAD-COF NPs ( $100 \mu\text{g mL}^{-1}$ ) + Laser ( $1 \text{ W cm}^{-2}$ , 10 min). Data are represented as mean  $\pm$  SD and analyzed by one-way ANOVA test.

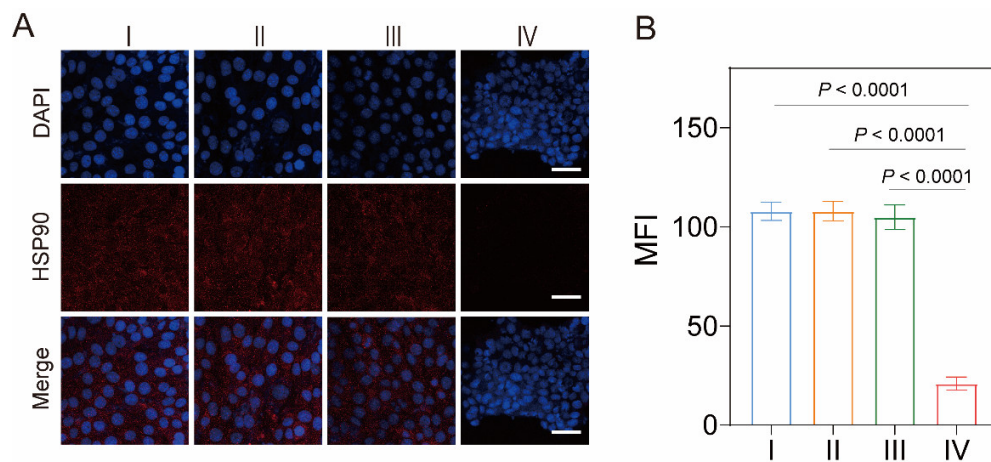

**Fig. S37.** (A) Immunofluorescence images of HSP90 expression in 4T1 cells from different treatment groups, and (B) the corresponding quantitative analysis of HSP90 fluorescence intensity ( $n = 3$ ). I: Control, II: Laser ( $1 \text{ W cm}^{-2}$ , 10 min), III: TPAD-COF NPs ( $100 \mu\text{g mL}^{-1}$ ), and IV: TPAD-COF NPs ( $100 \mu\text{g mL}^{-1}$ ) + Laser ( $1 \text{ W cm}^{-2}$ , 10 min). Scale bar:  $40 \mu\text{m}$ . Data are represented as mean  $\pm$  SD and analyzed by one-way ANOVA test.



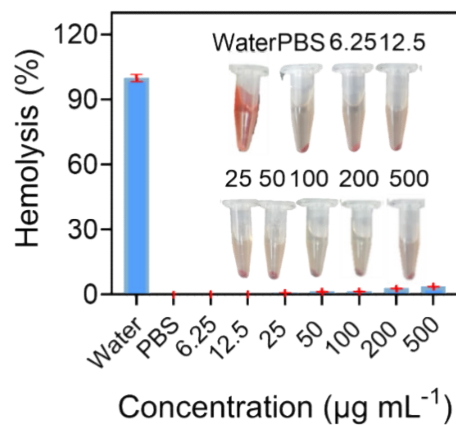

**Fig. S38.** Hemolytic activity of different concentrations of TPAD-COF NPs ( $n = 5$ ). Inset: Photograph of blood supernatant containing different doses of TPAD-COF NPs.

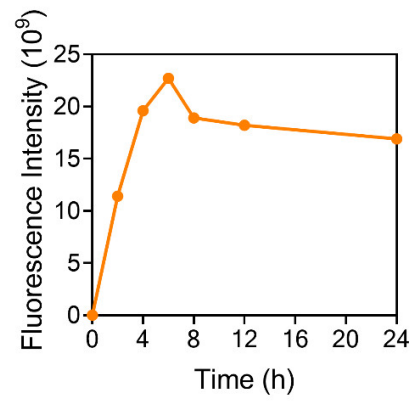

**Fig. S39.** Quantitative analysis of fluorescence intensity after intravenous injection of TPAD-COF NPs for various durations.

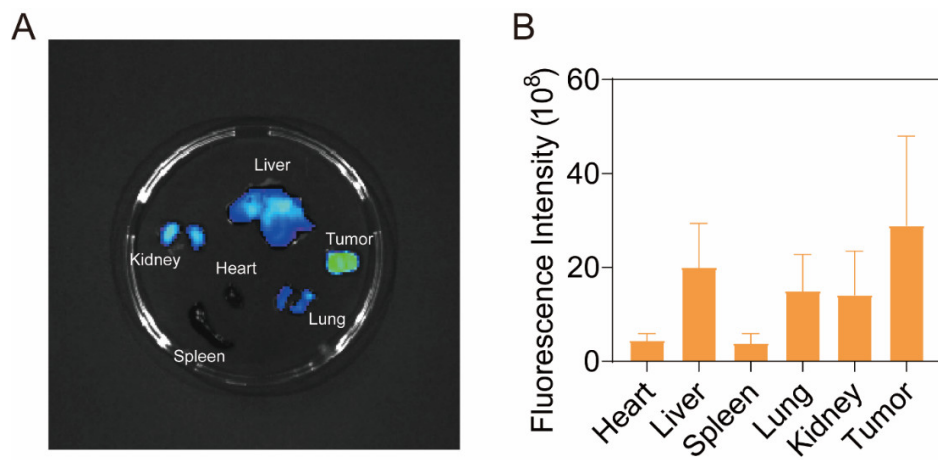

**Fig. S40.** (A) Fluorescence images, and (B) quantitative analysis of the main organs (heart, liver, spleen, lung, kidney) and tumor tissues of 4T1 tumor-bearing mice after intravenous injection ( $n = 3$ ). Data are represented as mean  $\pm$  SD.

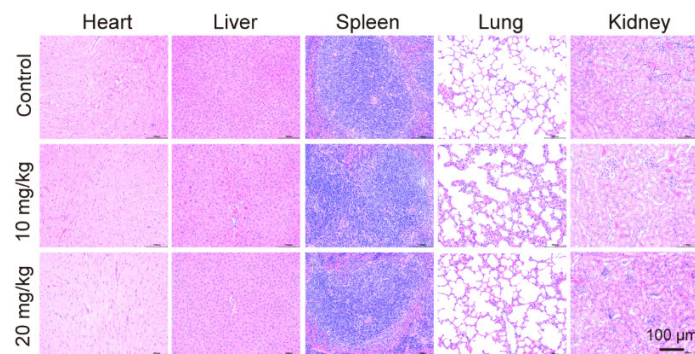

**Fig. S41.** H&E staining images of representative major organs from the mice after intravenous injection of different doses of TPAD-COF NPs for 15 days. Scale bar: 100  $\mu\text{m}$ .

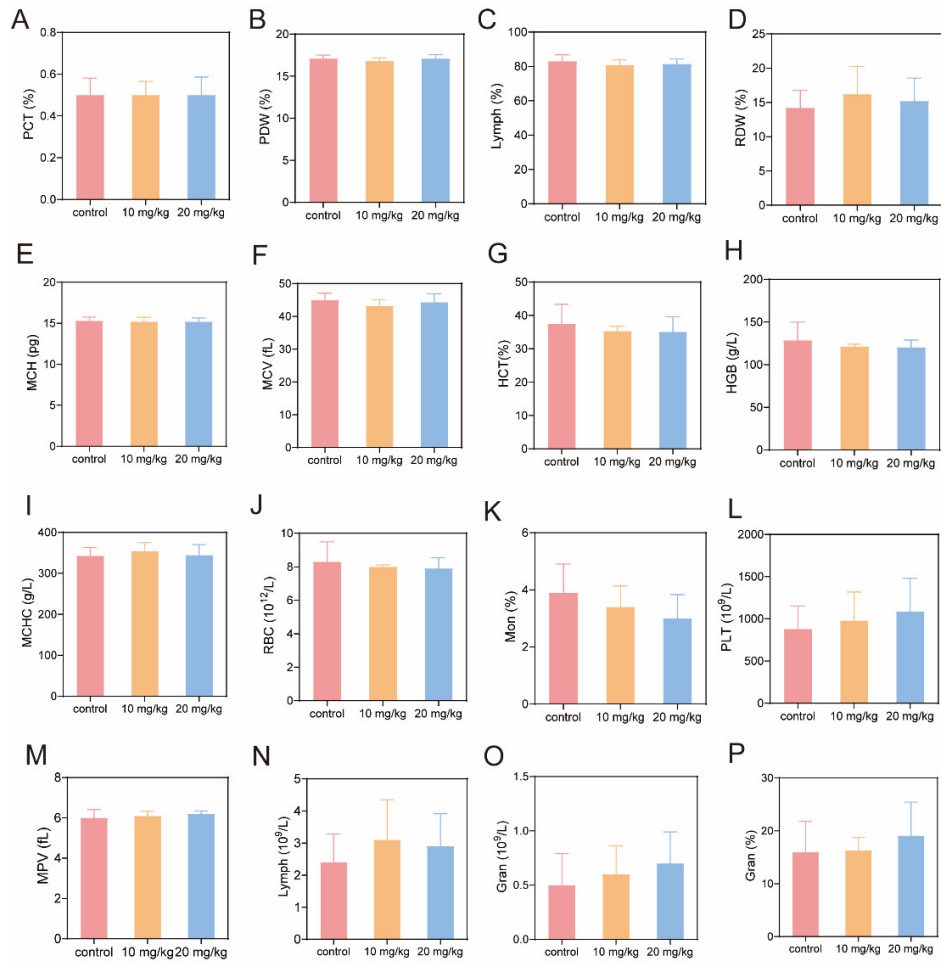

**Fig. S42.** Routine blood indexes of the Balb/c mice after intravenous injection with PBS (control) and different concentrations of TPAD-COF NPs, including (A) platelet distributing width (PCT), (B) platelet distribution width ratio (PDW%), (C) lymphocyte ratio (Lymph%), (D) red cell distribution width ratio (RDW%), (E) mean corpuscular hemoglobin (MCH), (F) mean corpuscular volume (MCV), (G) hematocrit ratio (HCT%), (H) hemoglobin (HGB), (I) mean corpuscular hemoglobin concentration (MCHC), (J) red blood cell (RBC), (K) absolute value of intermediate cell count ratio (Mon%), (L) platelet (PLT), (M) mean platelet volume (MPV), (N) lymphocytes (Lymph), (O) granulocyte (Gran), and (P) granulocyte ratio (Gran%) ( $n = 3$ ).

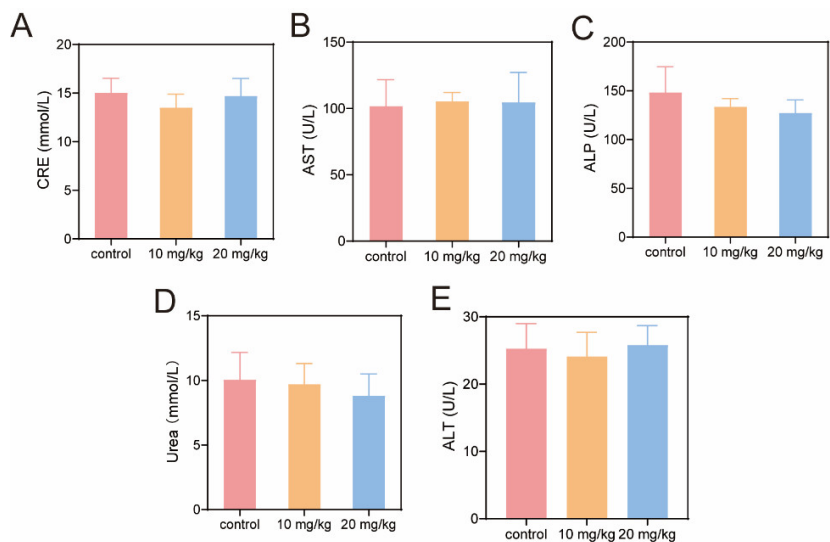

**Fig. S43.** Biochemical parameters of the Balb/c mice after intravenous injection with PBS (control) and diverse doses of TPAD-COF NPs, including (A) creatinine (CRE), (B) aspartate aminotransferase (AST), (C) alkaline phosphatase (ALP), (D) urea (Urea), and (E) alanine aminotransferase (ALT) ( $n = 3$ ).

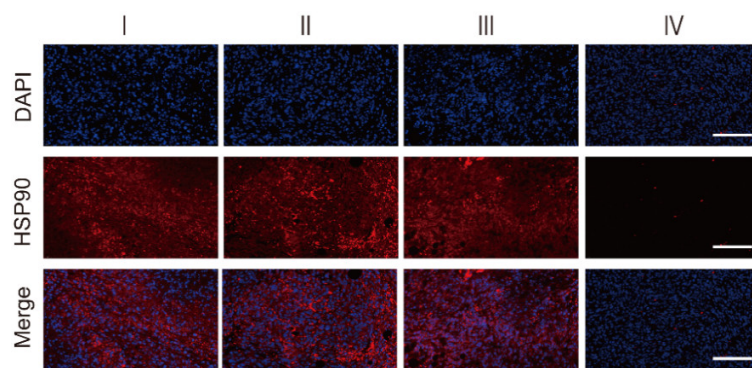

**Fig. S44.** Immunofluorescence images of HSP90 expression at tumor sites in different treatment groups. I: Control, II: Laser ( $1 \text{ W cm}^{-2}$ , 10 min), III: TPAD-COF NPs ( $100 \mu\text{g mL}^{-1}$ ), and IV: TPAD-COF NPs ( $100 \mu\text{g mL}^{-1}$ ) + Laser ( $1 \text{ W cm}^{-2}$ , 10 min). Scale bar: 100  $\mu\text{m}$ .

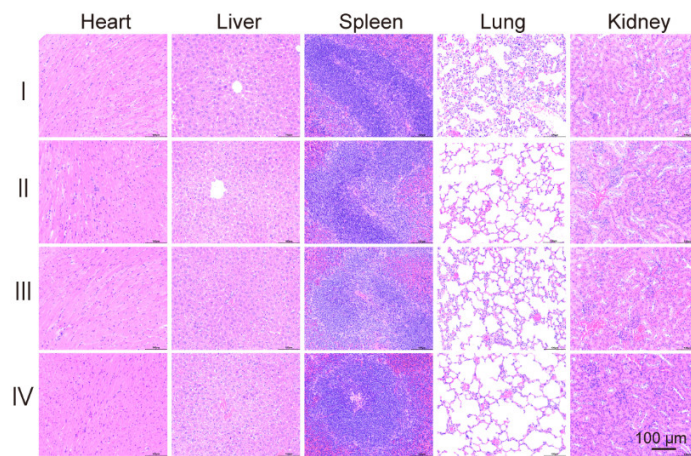

**Fig. S45.** H&E staining images of the major organs from the 4T1 tumor-bearing mice in various treatment groups. I: Control, II: Laser ( $1 \text{ W cm}^{-2}$ , 10 min), III: TPAD-COF NPs ( $100 \mu\text{g mL}^{-1}$ ), and IV: TPAD-COF NPs ( $100 \mu\text{g mL}^{-1}$ ) + Laser ( $1 \text{ W cm}^{-2}$ , 10 min). Scale bar: 100  $\mu\text{m}$ .



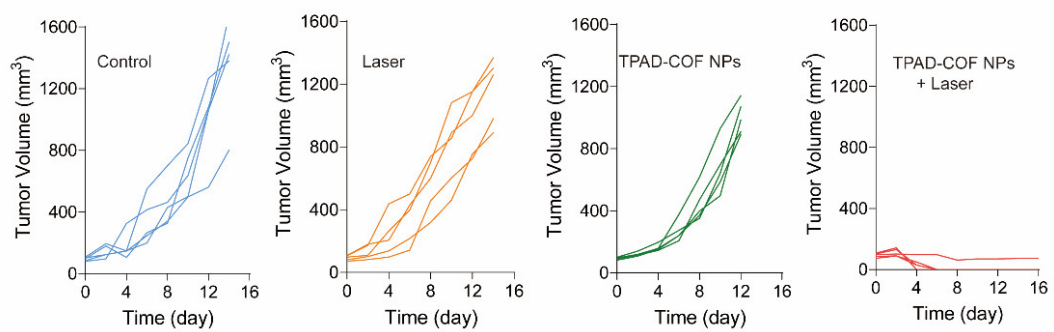

**Fig. S46.** Individual growth curves of primary tumors after different treatments ( $n = 5$ ).

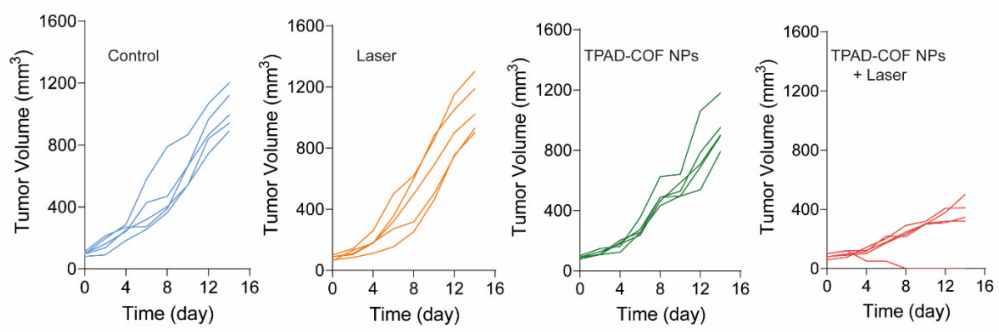

**Fig. S47.** Time-dependent growth curves of distant tumors after different treatments ( $n = 5$ ).

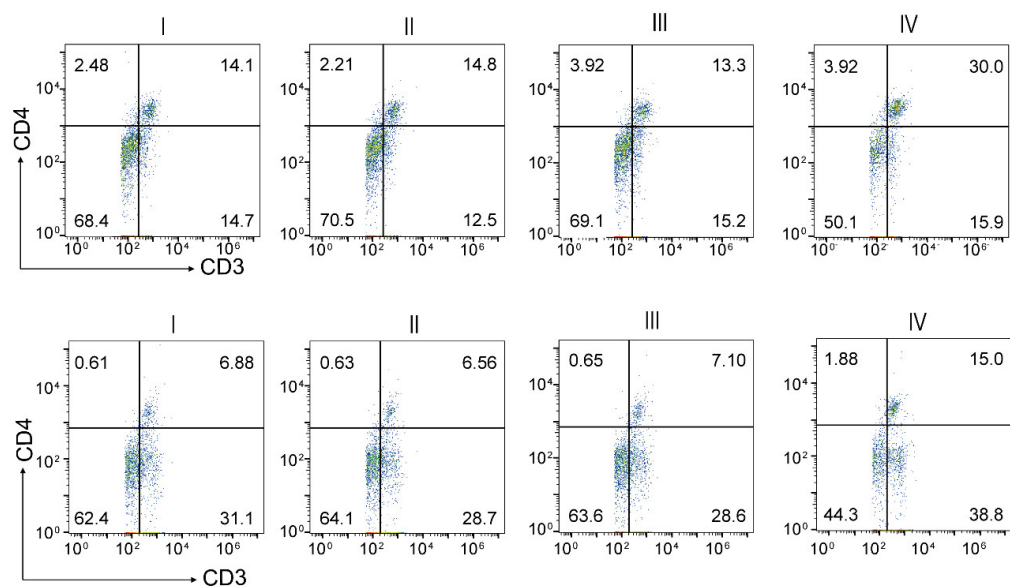

**Fig. S48.** Flow cytometry analysis of CD3<sup>+</sup>CD4<sup>+</sup> and CD3<sup>+</sup>CD8<sup>+</sup> T cells in tumor tissues of mice after different treatments. I: Control, II: Laser (1 W cm<sup>-2</sup>, 10 min), III: TPAD-COF NPs (100 μg mL<sup>-1</sup>), and IV: TPAD-COF NPs (100 μg mL<sup>-1</sup>) + Laser (1 W cm<sup>-2</sup>, 10 min).

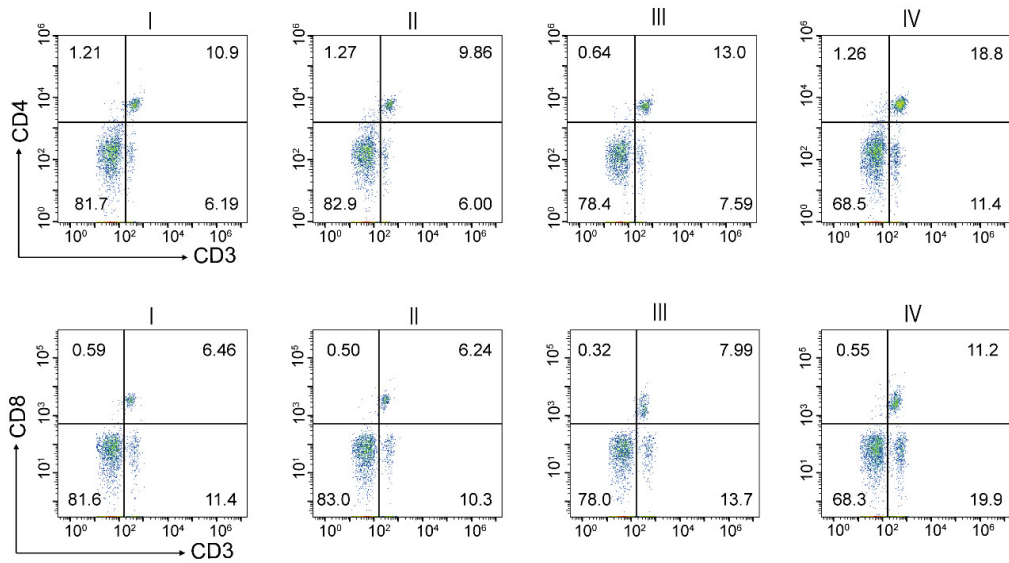

**Fig. S49.** Flow cytometry analysis of CD3<sup>+</sup>CD4<sup>+</sup> and CD3<sup>+</sup>CD8<sup>+</sup> T cells in spleen tissues of mice after different treatments. I: Control, II: Laser (1 W cm<sup>-2</sup>, 10 min), III: TPAD-COF NPs (100 μg mL<sup>-1</sup>), and IV: TPAD-COF NPs (100 μg mL<sup>-1</sup>) + Laser (1 W cm<sup>-2</sup>, 10 min).
